# Supplementary material for: Abnormalities on Chest Computed Tomography and Lung Function Following an Intense Dust Exposure: A 17-Year Longitudinal Study
Source: MDPI journal article supplement (doi:10.3390/ijerph16091655), 2019-05-13
Supplement: s1 [file s1]

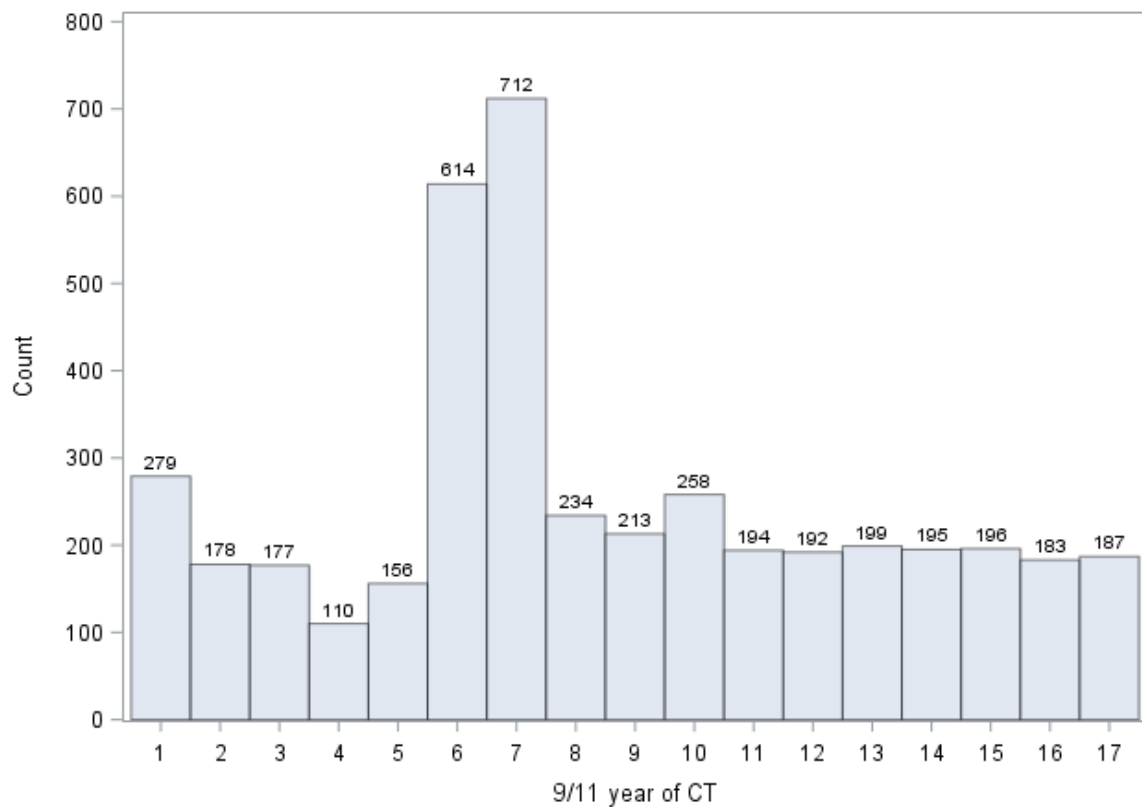

**Figure S1: Distribution of the timing of chest CT.** The histogram is showing the number of chest CT scans used for this study, grouped by year post-9/11. There is a peak at year 6–7 post-9/11, with 1049/4277 (25%) CT scans performed that year.
